# Supplementary material for: consensusDE: an R package for assessing consensus of multiple RNA-seq algorithms with RUV correction
Source: PeerJ. 2019 Dec 13;7:e8206. doi: 10.7717/peerj.8206 (PMC6913255; doi:10.7717/peerj.8206)
Supplement: Table S1 [file peerj-07-8206-s001.xlsx]

## Sheet: Sheet1
Software	RNA-seq algorithms	RUV option	Technical Replicate merging	Inputs	Count from alignment	Language/ Repository	Automatic analyses	Comparison Statistics	Annotation	Output plots	Limitations	Repository link	Reference
consensusDE	voom/limma, DESeq(2), edgeR	YES	YES	Pre processed count matrix (htseq output) or BAM files	YES	R/BioConductor	Yes. All pairs.	RankSum, Intersect & Union	YES. From provided GTF or tx-db object	Transcript mapped reads, Relative Log Expression (RLE), PCA, RUV residuals, Hierarchical clustering, Density distributions, Boxplot, MA plots, Volcano plots, p-value distributions	Requires knowledge of R.	https://bioconductor.org/packages/release/consensusDE
metaseqR	DESeq(1), edgeR, voom, NBPSeq, NOISeq, baySeq	NO	NO	Pre processed count matrix or BAM/SAM/BED files	YES	R/BioConductor	No. Must specify comparison.	Simes, Union, Intersect, PANDORA, Fishers & Whitlock	YES. Embedded in pre-processed counts file OR via biomaRT (download)	counts, MDS, biodetection, saturation, readnoise, filtered counts, correlation, boxplot, gc-bias, length-bias, mean-diff, mean-var, rna-comp, de-heatmap, volcano, bio-dist	Requires internet connection for generation of some reports. Requires knowledge of R. Implements predecessor algorithms. Requires users to specify comparisons as a contrast variable.	https://bioconductor.org/packages/release/metaseqR	Moulos P et al. 2015
consexpression	edgeR, DESeq(1), DESeq(2), NOISeq, baySeq, SAMSeq, EBSeq, voom, sleuth	NO	NO	NCBI - SRA	YES	bash;python;R/github	No.	Vote	NO	NO	No documentation. Not generalised, software released on presented analysis. Requires command line installation.	https://github.com/costasilvati/consexpression	Costa-Silva J et al. 2017
MultiRankSeq	DESeq(1), edgeR, baySeq	NO	NO	Pre processed count matrix	NO	R/Github	No. Must report groups. But could be wrapped.	RankSum	NO	heatmap, boxplot, correlation, venn, volcano	Requires knowledge of R. Not available on Bioconductor. Implements predecessor algorithms.	https://github.com/slzhao/MultiRankSeq	Guo Y et al. 2014
IDEAMEX	NOISeq, voom, DESeq(2), edgeR	NO. Option for batch correction.	NO	Pre processed count matrix	NO	PHP;SQL;R/webserver;github	No. Must specify contrast and step through web server.	Vote	NO	Correlograms, heatmaps, Venn, CPM plot, Boxplot, Densitiy, PCA, MDS, Volcano, MA, upset, venn	Targetted at non-bioinformaticians. Not compatible with high-throughput/automated analysis. Different plots produced from different RNA-seq methods	WEBSITE: http://www.uusmb.unam.mx/ideamex/ GITHUB: https://github.com/leticiaVega/IDEAMEX	Jacinto J et al. 2019
